# Supplementary material for: Design, monitoring and evaluation of a direct payments approach for an ecotourism strategy to reduce illegal hunting and trade of wildlife in Lao PDR
Source: PLoS One. 2018 Feb 28;13(2):e0186133. doi: 10.1371/journal.pone.0186133 (PMC5830036; doi:10.1371/journal.pone.0186133)
Supplement: S2 File — (XLSX) [file pone.0186133.s002.xlsx]

## Sheet: Infraction
Infraction statistics
	Year1 (2009-10)	Year2 (2010-11)	Year3 (2011-12)	Year4 (2012-13)
Naphieng
Hometong
Homephun	1=25%
Soblaab
Mor
Phiengdee	1=25%
Sonkoua		1=25%	2=50% but 25% deduct	7 =100%
Korhing	2=50%
Soblao	2=50%
Houayhoo			1=25% not deduct
Hong Aoi				1=25%
Phiengxai
Phuck Gna			1 =25% not deduct
Meuang Aor
Total	6	1	4	8
